# Supplementary material for: COVID-19 pneumonia: high diagnostic accuracy of chest CT in patients with intermediate clinical probability
Source: Springer Nature journal article supplement (doi:10.1007/s00330-020-07346-y), 2020-10-03
Supplement: 330_2020_7346_MOESM1_ESM.pdf [file 330_2020_7346_MOESM1_ESM.pdf]

## Clinical data and outcomes of patients with PCR negative and CT scans classified as high probable

|    | Clinical symptoms                                                    | O2 level | Crackles   | Chest X ray            | Hospitalization | PCR date                            | CT scan date classification by radiologists* | Evolution       | Consensus diagnosis |
|----|----------------------------------------------------------------------|----------|------------|------------------------|-----------------|-------------------------------------|----------------------------------------------|-----------------|---------------------|
| 1  | Cough, fever, myalgias                                               | 93       | Bilateral  | Equivocal              | Yes             | 20/03                               | 21/03 1+1                                    | Recovery        | COVID +             |
| 2  | Cough, fever, chest pain                                             | 99       | No         | Normal                 | Yes             | 23/03                               | 23/03 1+1                                    | Recovery        | COVID +             |
| 3  | Cough, fever, headache, diarrhea                                     | 92       | Unilateral | Unilateral infiltrates | Yes             | 29/03                               | 29/03 1+1                                    | Recovery        | COVID +             |
| 4  | Dyspnea, cough, fever, diarrhea                                      | 92       | Bilateral  | Equivocal              | Yes             | 02/04                               | 02/04 1+1                                    | Deceased in ICU | COVID +             |
| 5  | Dyspnea, cough, myalgias                                             | 98       | No         | Normal                 | Yes             | 31/03                               | 31/03 1+1                                    | Recovery        | COVID +             |
| 6  | Cough, fever, myalgias, chest pain                                   | 92       | Unilateral | Equivocal              | Yes             | 31/03                               | 31/03 1+1                                    | Recovery        | COVID +             |
| 7  | Fatigue, cough, sputum, fever                                        | 95       | Unilateral | Equivocal              | Yes             | 01/04                               | 01/04 1+1                                    | Recovery        | COVID +             |
| 8  | Cough, sputum, fever, headache                                       | 94       | Unilateral | Equivocal              | Yes             | 03/04                               | 03/04 1+1                                    | Recovery        | COVID +             |
| 9  | Dyspnea, headache, myalgias, fever, fatigue                          | 100      | No         | Normal                 | Yes             | 02/04                               | 02/04 2+1                                    | Recovery        | COVID +             |
| 10 | Cough, fever, headache, vomiting, diarrhea                           | 100      | No         | Normal                 | Yes             | 02/04                               | 02/04 1+1                                    | Recovery        | COVID +             |
| 11 | Myalgias, cough, fever, headache, dyspnea, thoracic pain, dysgueusia | 92       | Bilateral  | Equivocal              | Yes             | 03/04                               | 03/03 1+1                                    | Recovery        | COVID +             |
| 12 | Fever, no respiratory symptom                                        | 100      | No         | Normal                 | No              | 03/04                               | 03/04 1+4                                    | Unknown         | COVID -             |
| 13 | Fever, headache, myalgias, anosmia, dyspnea                          | 93       | Bilateral  | Normal                 | Yes             | 04/04                               | 04/04 1+1                                    | Recovery        | COVID +             |
| 14 | Dyspnea, cough, sputum                                               | 92       | Bilateral  | Equivocal              | Yes             | 04/04                               | 04/04 1+1                                    | Recovery        | COVID +             |
| 15 | Fever, cough, diarrhea, confusion                                    | 94       | Unilateral | Equivocal              | Yes             | 04/04                               | 04/04 1+1                                    | Recovery        | COVID +             |
| 16 | Cough, myalgias, anosmia, dyspnea                                    | 90       | Unilateral | Bilateral infiltrates  | Yes             | 08/04<br>negative,<br>15/4 positive | 08/04 1+1                                    | Deceased in ICU | COVID +             |

\*1= high probable diagnosis; 2= probable diagnosis; 4 = alternative diagnosis
